# Supplementary material for: Pharmacokinetics of vaginal versus buccal misoprostol for labor induction at term
Source: PubMed Central journal article supplement — Clin Transl Sci. 2022 Jun 12;15(8):1937–45. doi: 10.1111/cts.13306 (PMC9372425; doi:10.1111/cts.13306), 2022-06-12
Supplement: CTS-15-1937-s001.pdf [file CTS-15-1937-s001.pdf]

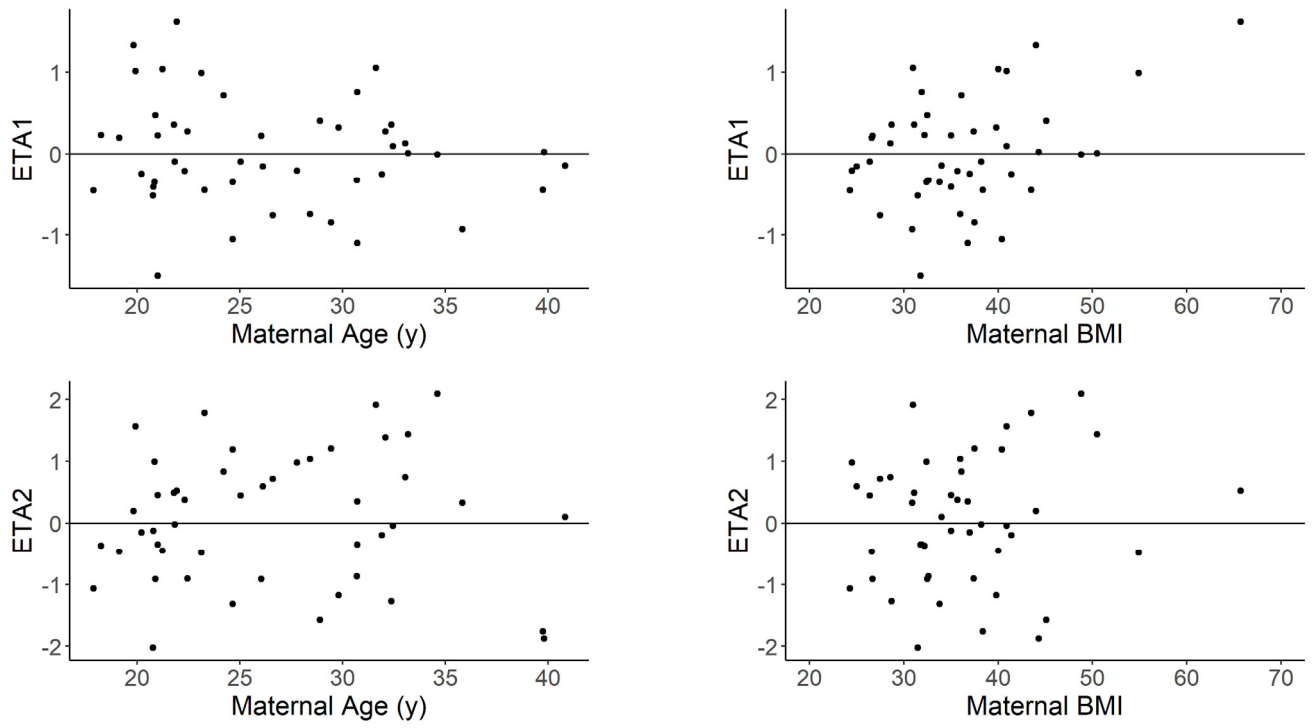

**Supplemental Figure 1.** ETA plots for Clearance (ETA1) and Volume (ETA2) vs. maternal age and BMI.

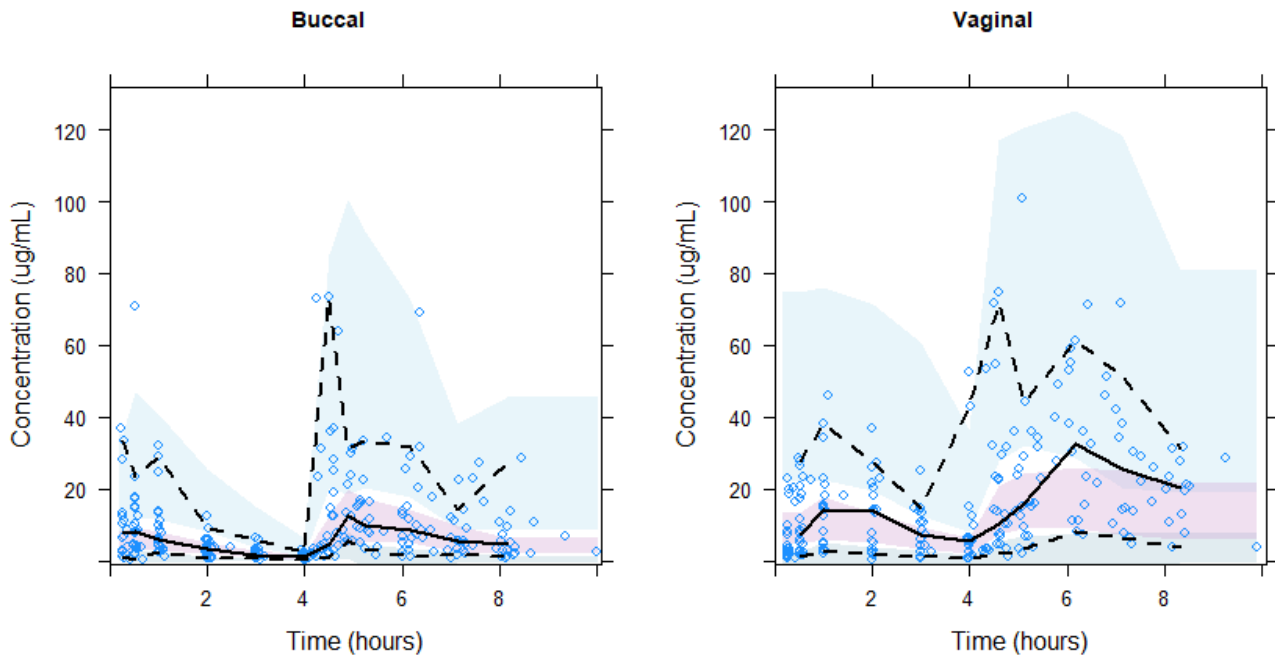

**Supplemental Figure 2.** Visual predictive checks for buccal and vaginal dosing of misoprostol. Observed data are represented by open circles. The solid black line indicates the median and the dashed lines the 5<sup>th</sup> and 95<sup>th</sup> percent confidence intervals of the observed data. The pink shaded region represents the 90% confidence interval of the median predicted concentrations and the blue shaded region represents the 90% confidence interval of the 5<sup>th</sup> and 95<sup>th</sup> percent prediction intervals for the predicted data.
